# Supplementary material
Source: PubMed Central journal article supplement (PMC2820168)
Supplement: mmc1.pdf [file mmc1.pdf]

**AJHG, Volume 86**

**Supplemental Data**

**GWA in a High-Risk Isolate for MS**

**Reveals Associated Variants in STAT3 Gene**

**Eveliina Jakkula, Virpi Leppä, Anna-Maija Sulonen, Teppo Varilo, Suvi Kallio, Anu Kemppinen, Shaun Purcell, Keijo Koivisto, Pentti Tienari, Marja Liisa Sumelahti, Irina Elovaara, Tuula Pirttilä, Mauri Reunanen, Arpo Aromaa, Annette Bang Oturai, Helle Bach Søndergaard, Hanne F. Harbo, Inger-Lise Mero, Stacey B. Gabriel, Daniel B. Mirel, Stephen L. Hauser, Ludwig Kappos, Chris Polman, Philip L. De Jager, David A. Hafler, Mark J. Daly, Aarno Palotie, Janna Saarela, and Leena Peltonen**

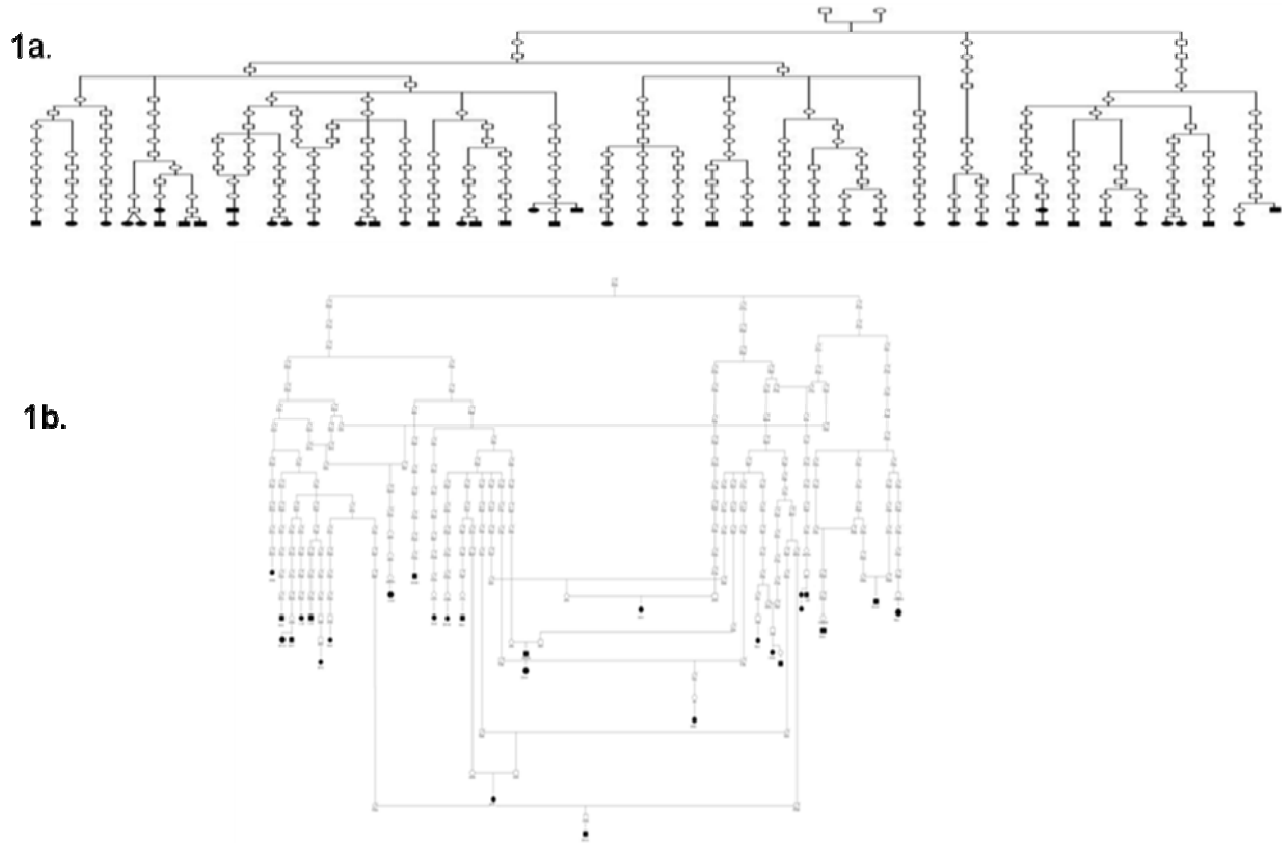

**Figure S1. The Extended Pedigrees for the Isolate Study Set**

Figure 1a and b present the extended pedigrees of the Southern Ostrobothnia originating cases reaching up to 18 generations back. We constructed the pedigrees using genealogical information from population registries in accordance with published criteria. Only the shortest connections of relatedness within extended families are shown, although there is extensive interrelatedness in the pedigrees. These pedigrees are supportive of founder effect.

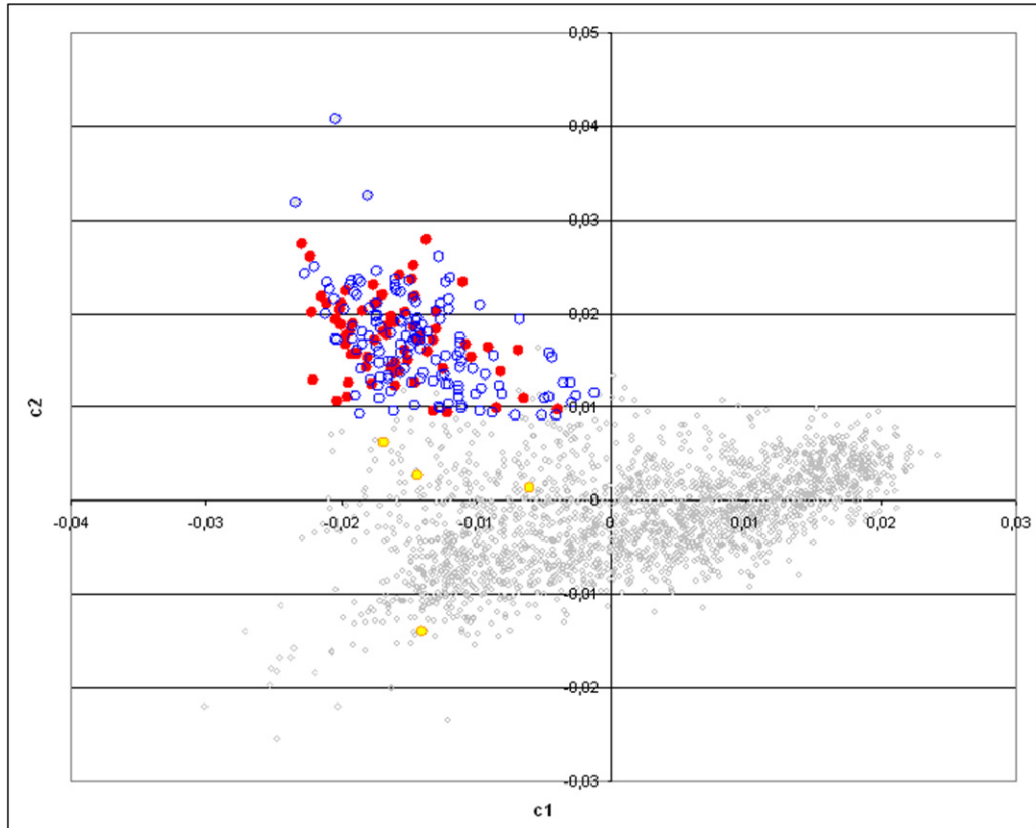

**Figure S2. The MDS Plot of the GWA Sample Set**

The two first dimensions (c1, c2) of the multidimensional scaling analysis of IBS sharing distances between individuals are plotted. MS cases included in the study (n = 68) are indicated with red dots, MS cases excluded from the study (n = 4) based on the results of MDS (not clustering with Southern Ostrobothnia originating cases) are indicated with yellow dots, selected controls (n = 136) with blue open circles and population controls by grey circles. The first and the second dimensions of MDS-analysis as well as principal component analysis have recently been shown to correlate with east-west (c1) and South - North geographical axes within Finland<sup>23</sup>.

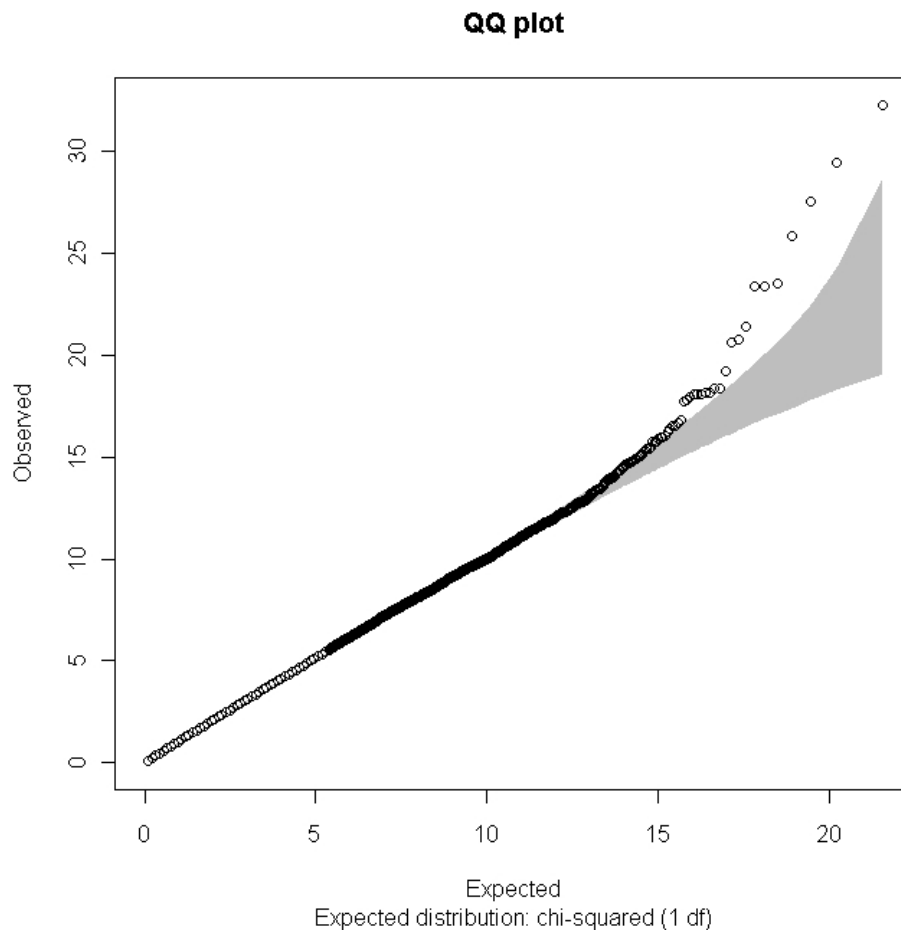

**Figure S3. Quantile-Quantile (QQ) Plot of  $\chi^2$  Expected vs. Observed Statistics of Single SNP Allele Association Analysis**

QQ-plot follows null-hypothesis and only end-of-tail distribution differs showing possible real association signals. No major inflation of  $\chi^2$ -statistics is present and thus cases and controls are well-matched.

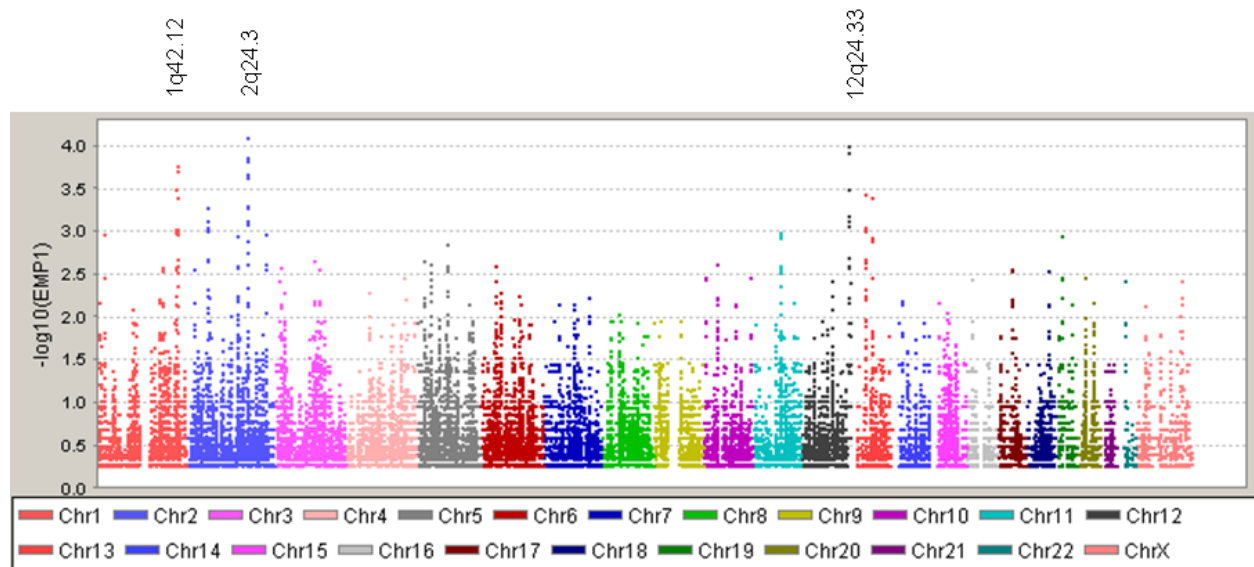

**Figure S4. The Regions of Homozygosity (ROHs) Enriched in Cases**

Regions in chromosomes 1, 2 and 12 illustrate more homozygous segments in cases compared to controls. Empirical p-values (EMP1) obtained by comparing ROHs in cases and controls and evaluation of statistical significance was obtained by permutation. X-axis depicts each chromosome in distinguishable colour and Y-axis represents  $-\log_{10}(P)$  of empirically obtained P-values.

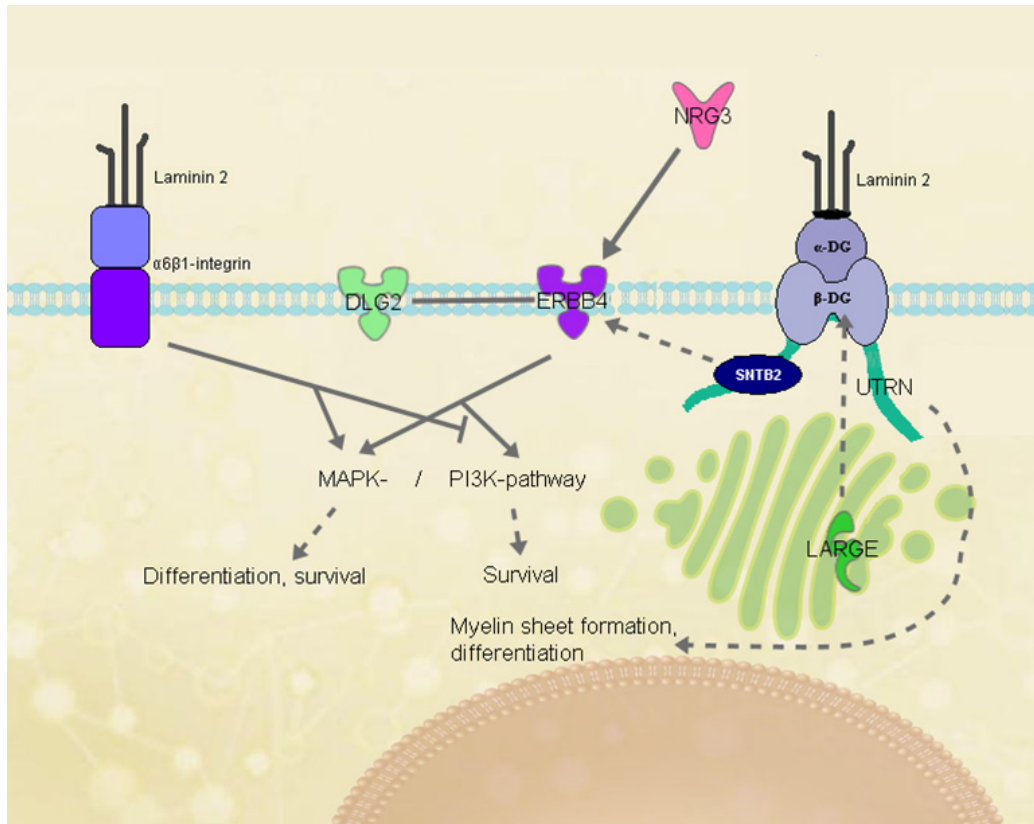

**Figure S5. The Pathway Involving the Genes *NRG3*, *ERBB4*, *DLG2*, *UTRN*, and *LARGE***

The pathway involving the genes *NRG3*, *ERBB4*, *DLG2*, *UTRN* and *LARGE* detected with Ingenuity Pathway Analysis (Ingenuity® Systems, www.ingenuity.com) potentially regulates oligodendrocyte differentiation and myelin sheet formation. Neuregulin 3 (coded by *NRG3*-gene) is a neural growth factor which inhibits apoptosis of oligodendrocyte precursor cells through its receptor ERBB4 and PI3-K-pathway<sup>40</sup>. DLG2 (PSD-93, chapsyn-110) is likely to be involved in the assembly of ERBB4 to the cell membranes, in ERBB4 turnover and neuregulin signaling<sup>41,38</sup>. The differentiation of oligodendrocyte precursors and the proper formation of myelin sheets by mature oligodendrocytes seems to be regulated by interactions between neuregulin-ERBB –mediated signaling, laminin-2-integrin signaling and laminin-2-dystroglycan (DG) signaling<sup>36,37</sup>. Though the exact intracellular pathways in laminin-2-dystroglycan signaling mediated myelin sheet formation are unknown, dystroglycan is known to bind utrophin (UTRN). Utrophin in turn binds β2-syntrophin (SNTB2), which has a binding site for ERBB4<sup>38</sup>, thus potentially enabling direct interactions between ERBB4 and dystroglycan-utrophin-complex. Like-glycosyltransferase (LARGE) is an important glycosyl transferase for dystroglycan. Mutations in *LARGE*-gene cause congenital muscular dystrophy type 1D (MDC1D [MIM #608840]), a muscular dystrophy with profound mental retardation, white matter changes and subtle structural abnormalities on brain MRI<sup>39</sup>. Figure modified from Ingenuity Pathway Analysis.

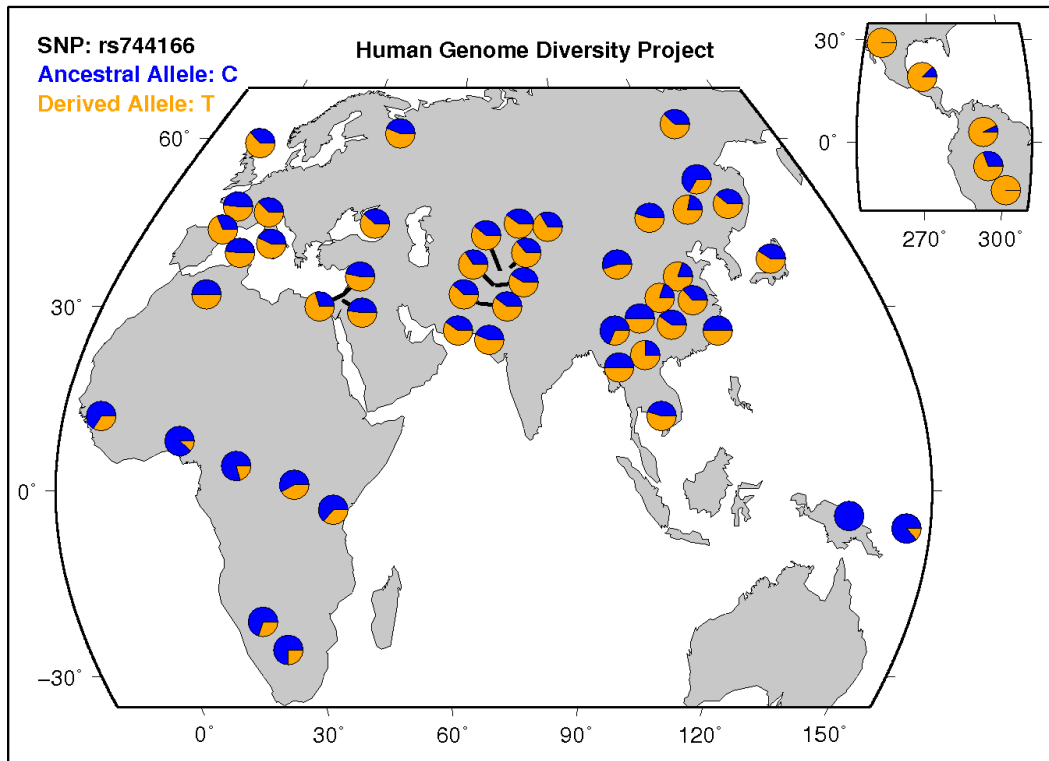

**Figure S6. The Worldwide Distribution of rs744166 Alleles**

The distribution of the rs744166 alleles as courtesy of the Human Genome Diversity Panel team<sup>45</sup>. The derived A-allele (here T-allele) tags the MS-protective haplotype in populations outside Africa and therefore the picture illustrates the proportion of the protective haplotype in different populations. The protective allele has become more common in populations outside Africa, but seems to be absent in the Oceanian populations near the Equator.

**Table S1. Overlapping Extended Regions of Homozygosity (ROHs) Enriched in Cases (Empirical P <10<sup>-3</sup> Evaluated by Permutation)**

| Overlapping Consensus Region Identified in Cases |            |          |             |           |              | ROH of 50 SNPs and 500 kb Extending within Each Region |                   |                      | Identified Overlapping Region as Homozygous |                   |
|--------------------------------------------------|------------|----------|-------------|-----------|--------------|--------------------------------------------------------|-------------------|----------------------|---------------------------------------------|-------------------|
| Chr                                              | Start (Mb) | End (Mb) | Length (kb) | N of SNPs | Gene(s)      | N of Cases (%)                                         | N of Controls (%) | EMP1                 | N of Cases (%)                              | N of Controls (%) |
| 1                                                | 220,967    | 221,209  | 242         | 24        | <i>CNIH3</i> | 11 (16%)                                               | 3 (2%)            | 3 x 10 <sup>-4</sup> | 11 (16%)                                    | 11 (8%)           |
| 2                                                | 167,634    | 168,146  | 512         | 39        | <i>CMYA3</i> | 30 (44%)                                               | 26 (19%)          | 8 x 10 <sup>-5</sup> | 27 (40%)                                    | 27 (20%)          |
| 12                                               | 130,783    | 131,355  | 573         | 48        | multiple     | 9 (13%)                                                | 1 (0.4%)          | 3 x 10 <sup>-4</sup> | 7 (10%)                                     | 2 (1%)            |

ROHs with a minimum length of 50 SNPs and 500 kb were identified first in each individual. Then, ROHs in cases were compared to controls to expose regions of homozygosity enriched in cases. Overlapping consensus region of ROHs in cases were then identified within these enriched regions and boundaries for consensus region were determined. The frequencies for ROHs within each region (as defined by boundaries identified in cases) are presented in the table for both cases and controls both as defining ROH as 50 SNP and 500 kb and only for the overlapping consensus region (fewer SNPs and shorter length). EMP1 corresponds for empirical P-value obtained by permutation.



**Table S2. Identical-by-Descent (IBD)-Sharing Estimates between Cases and Controls**

|                                                        | <b>N of Case-Case Pairs (%)</b> | <b>N of Case-Control Pairs (%)</b> | <b>N of Control-Control Pairs (%)</b> |
|--------------------------------------------------------|---------------------------------|------------------------------------|---------------------------------------|
| <b><math>\pi\text{-hat} = 0</math></b>                 | 1543 (67.73 %)                  | 6204 (67.08 %)                     | 5960 (64.92)                          |
| <b><math>0 &lt; \pi\text{-hat} &lt; 0.01</math></b>    | 435 (19.10 %)                   | 1829 (19.78 %)                     | 1935 (21.08 %)                        |
| <b><math>0.01 &gt; \pi\text{-hat} &gt; 0.03</math></b> | 286 (12.55 %)                   | 1168 (12.63 %)                     | 1214 (13.22 %)                        |
| <b><math>0.03 &gt; \pi\text{-hat} &gt; 0.06</math></b> | 7 (0.31 %)                      | 45 (0.49 %)                        | 66 (0.72 %)                           |
| <b><math>0.06 &gt; \pi\text{-hat} &gt; 0.12</math></b> | 1 (0.04 %)                      | 2 (0.02 %)                         | 2 (0.02 %)                            |
| <b><math>0.12 &gt; \pi\text{-hat} &gt; 0.25</math></b> | 4 (0.18 %)                      | 0 (0 %)                            | 2 (0.02 %)                            |
| <b><math>\pi\text{-hat} &gt; 0.25</math></b>           | 2 (0.09 %)                      | 0 (0 %)                            | 1 (0.01 %)                            |
| <b>Total n of pairs</b>                                | 2278                            | 9248                               | 9180                                  |

IBD-sharing estimates were calculated between case-case, case-control and control-control pairs using genome-wide SNP data.  $\pi\text{-hat}$  corresponds to the proportion of the genome that is estimated to be shared by IBD between two individuals. Theoretically, 1<sup>st</sup> degree relatives (parent-child and sibling-sibling pairs) share 50 % of their genome by IBD, 2<sup>nd</sup> degree relatives share 25 % of their genome by IBD, 3<sup>rd</sup> degree relatives (eg 1<sup>st</sup> cousins) 12.5 %, 4<sup>th</sup> degree relatives 6.3 %, 5<sup>th</sup> degree relatives 3.1 %, 6<sup>th</sup> degree relatives 1.6 % and 7<sup>th</sup> degree relatives 0.78 %. Thus, as suggested by genealogical research, results of these IBD-estimations show that most relationships between cases and between cases and controls are distant and no 1<sup>st</sup> degree relatives were observed in any of the groups. The closest known relatives included in case group were 2<sup>nd</sup> degree relatives and their genetic relationship based on IBD-estimates correlated well with their known relationships. No unknown close relationships were observed in case groups, no genealogical information was available for controls.

**Table S3. The Description of All CNVs Found in the Isolate GWA Samples**

| Chr | Start (b35) | End (b35) | Size (bp) | N of SNPs | Copy Number Type <sup>a</sup> | Cases (n=68) | Cases Freq. | Db of Genomic Variants, August 5th 2009 Freeze | Genes                                                       |
|-----|-------------|-----------|-----------|-----------|-------------------------------|--------------|-------------|------------------------------------------------|-------------------------------------------------------------|
| 1   | 2058523     | 2312823   | 254301    | 21        | gain                          | 3            | 4.4%        | Known variation                                | PRKCZ, C1orf86, SKI, MORN1                                  |
| 1   | 12354566    | 12763485  | 408920    | 36        | gain                          | 1            | 1.5%        | Known variation                                | VPS13D, DHRS3, AADAACL4, AADAACL3, C1orf158, after TNFRSF1B |
| 1   | 102379409   | 102651711 | 272303    | 21        | loss                          | 1            | 1.5%        | Known variation                                |                                                             |
| 1   | 120776649   | 120923841 | 147193    | 7         | gain                          | 2            | 2.9%        | Known variation                                |                                                             |
| 1   | 193569717   | 193628745 | 59029     | 6         | loss                          | 4            | 5.9%        | Known variation                                | CFHR4                                                       |
| 2   | 19443       | 189678    | 170236    | 14        | gain                          | 1            | 1.5%        | Known variation                                | FAM110C                                                     |
| 2   | 35725730    | 35999293  | 273564    | 40        | loss                          | 1            | 1.5%        | Known variation                                |                                                             |
| 2   | 49511191    | 49664240  | 153050    | 21        | loss                          | 2            | 2.9%        | Known variation                                |                                                             |
| 2   | 53071353    | 53103920  | 32568     | 4         | loss                          | 1            | 1.5%        | Known variation                                |                                                             |
| 2   | 54354348    | 54404322  | 49975     | 7         | loss                          | 1            | 1.5%        | NEW                                            | ACYP2 intron, TSPYL6                                        |
| 2   | 86983132    | 87615568  | 632437    | 3         | gain                          | 1            | 1.5%        | Known variation                                | CD8B1, PLGLB1, RGPDI                                        |
| 2   | 89772948    | 89932893  | 159946    | 3         | loss                          | 7            | 10.3%       | Known variation                                |                                                             |
| 2   | 99215459    | 99306408  | 90950     | 4         | gain                          | 3            | 4.4%        | Known variation                                | TSGA10, C2orf15, LIPT1, MITD1, MRPL30, LYG2, LYG1           |
| 2   | 110214618   | 110292098 | 77481     | 7         | loss                          | 1            | 1.5%        | Known variation                                | MALL, NPHP1                                                 |
| 2   | 212981040   | 213018166 | 37127     | 5         | loss                          | 3            | 4.4%        | Known variation                                | ERBB4 intron                                                |
| 2   | 241106342   | 241131279 | 24938     | 6         | gain                          | 1            | 1.5%        | Known variation                                | GPC1                                                        |
| 3   | 41894       | 108412    | 66519     | 8         | gain                          | 1            | 1.5%        | Known variation                                | CHL1 promoter                                               |
| 3   | 4021691     | 4329697   | 308007    | 35        | loss                          | 1            | 1.5%        | Known variation                                | SETMAR                                                      |
| 3   | 5383302     | 5411345   | 28044     | 6         | loss                          | 1            | 1.5%        | Known variation                                |                                                             |
| 3   | 24134391    | 24172277  | 37887     | 8         | loss                          | 1            | 1.5%        | NEW                                            | THRB, last 6 exons                                          |
| 3   | 65166887    | 65187636  | 20750     | 3         | loss                          | 1            | 1.5%        | Known variation                                |                                                             |
| 3   | 152993783   | 153028739 | 34957     | 7         | loss                          | 3            | 4.4%        | Known variation                                | AADAC                                                       |
| 4   | 84915835    | 84969552  | 53718     | 10        | loss                          | 1            | 1.5%        | Known variation                                |                                                             |
| 4   | 132303980   | 132685819 | 381840    | 24        | gain                          | 1            | 1.5%        | Known variation                                |                                                             |

|   |           |           |        |    |      |   |      |                 |                                                               |
|---|-----------|-----------|--------|----|------|---|------|-----------------|---------------------------------------------------------------|
| 4 | 167425804 | 167482371 | 56568  | 8  | gain | 1 | 1.5% | Known variation | After TLL1                                                    |
| 4 | 190200031 | 191131631 | 931601 | 93 | gain | 1 | 1.5% | Known variation |                                                               |
| 5 | 19055301  | 19305295  | 249995 | 22 | loss | 1 | 1.5% | Known variation |                                                               |
| 5 | 97074222  | 97121798  | 47577  | 7  | loss | 5 | 7.4% | Known variation | RIOK2 near                                                    |
| 5 | 104465860 | 104510644 | 44785  | 3  | loss | 1 | 1.5% | Known variation |                                                               |
| 5 | 178661436 | 178854467 | 193032 | 25 | gain | 1 | 1.5% | Known variation | ADAMTS2                                                       |
| 6 | 5496231   | 5522147   | 25917  | 7  | loss | 1 | 1.5% | Known variation | FARS2, intron                                                 |
| 6 | 29076909  | 29287216  | 210308 | 25 | loss | 1 | 1.5% | Known variation | ZNF311, OR2W1, OR2B3, OR2J3, OR2J2                            |
| 6 | 67044129  | 67104015  | 59887  | 11 | loss | 5 | 7.4% | Known variation | BAI3 promoter                                                 |
| 6 | 95472452  | 95649511  | 177060 | 9  | loss | 1 | 1.5% | Known variation |                                                               |
| 6 | 137942200 | 138003365 | 61166  | 21 | gain | 1 | 1.5% | Known variation | OLIG3 promoter, TNFAIP3 promoter                              |
| 6 | 144743809 | 145071977 | 328169 | 32 | loss | 1 | 1.5% | Known variation | UTRN, many exons                                              |
| 7 | 3175715   | 3252673   | 76959  | 8  | loss | 1 | 1.5% | Known variation | SDK1, intron                                                  |
| 7 | 6643875   | 7123923   | 480049 | 54 | gain | 1 | 1.5% | Known variation | C1GALT1                                                       |
| 7 | 8882102   | 8996708   | 114607 | 23 | loss | 3 | 4.4% | Known variation | After NXPH1                                                   |
| 7 | 9790639   | 9877397   | 86759  | 9  | loss | 2 | 2.9% | Known variation |                                                               |
| 7 | 12560343  | 12685347  | 125005 | 17 | loss | 1 | 1.5% | Known variation |                                                               |
| 7 | 69761016  | 70029858  | 268843 | 22 | gain | 1 | 1.5% | Known variation | After AUTS2, WBSCR17 promoter                                 |
| 7 | 70919613  | 71427575  | 507963 | 52 | gain | 1 | 1.5% | Known variation | CALN1, exons 1-3                                              |
| 7 | 75690975  | 76059191  | 368217 | 6  | gain | 1 | 1.5% | Known variation | ZP3, DTX2, UPK3B, POMZP3                                      |
| 7 | 119899100 | 119906697 | 7598   | 3  | loss | 1 | 1.5% | Known variation | KCND2, intron                                                 |
| 7 | 152959823 | 153145033 | 185211 | 20 | gain | 1 | 1.5% | Known variation | DPP6                                                          |
| 8 | 5590045   | 5591685   | 1641   | 3  | loss | 1 | 1.5% | Known variation |                                                               |
| 8 | 16170358  | 16306880  | 136523 | 11 | loss | 1 | 1.5% | Known variation | MSR1 promoter                                                 |
| 8 | 87256166  | 87403084  | 146919 | 11 | gain | 1 | 1.5% | Known variation | SLC7A13, WWP1 promoter                                        |
| 8 | 92192384  | 92243291  | 50908  | 4  | loss | 5 | 7.4% | Known variation | Hypothetical protein FLJ27355, after OTUD6B, SLC26A7 promoter |
| 8 | 137757412 | 137919630 | 162219 | 13 | loss | 1 | 1.5% | Known variation |                                                               |
| 9 | 5296824   | 5325470   | 28647  | 6  | loss | 1 | 1.5% | Known variation | RLN1                                                          |
| 9 | 10651370  | 10676202  | 24833  | 7  | loss | 1 | 1.5% | Known variation | PTPRD promoter                                                |
| 9 | 21743138  | 21761241  | 18104  | 4  | gain | 1 | 1.5% | NEW             | MTAP promoter                                                 |

|    |           |           |         |     |      |    |       |                 |                                                                                                                                     |
|----|-----------|-----------|---------|-----|------|----|-------|-----------------|-------------------------------------------------------------------------------------------------------------------------------------|
| 9  | 28534375  | 28556849  | 22475   | 5   | loss | 3  | 4.4%  | Known variation | LINGO2                                                                                                                              |
| 9  | 69329605  | 69348516  | 18912   | 4   | loss | 1  | 1.5%  | Known variation | APBA1, intron                                                                                                                       |
| 9  | 70946694  | 71169744  | 223051  | 32  | gain | 1  | 1.5%  | Known variation | TRPM3 promoter & exon1                                                                                                              |
| 9  | 71310230  | 71589788  | 279559  | 48  | gain | 1  | 1.5%  | Known variation | TMEM2                                                                                                                               |
| 10 | 15030375  | 15100889  | 70515   | 6   | loss | 1  | 1.5%  | Known variation | DCLRE1C, MEIG1                                                                                                                      |
| 10 | 47013328  | 47173619  | 160292  | 12  | gain | 12 | 17.6% | Known variation | ANXA8 promoter                                                                                                                      |
| 10 | 51457810  | 51805221  | 347412  | 28  | gain | 1  | 1.5%  | Known variation | FAM21A, ASAH2, SGMS1                                                                                                                |
| 10 | 66102105  | 67710331  | 1608227 | 209 | loss | 1  | 1.5%  | Known variation | CTNNA3                                                                                                                              |
| 10 | 81567594  | 82006206  | 438613  | 40  | gain | 1  | 1.5%  | Known variation | SFTPD, C10orf57, PLAC9, ANXA11                                                                                                      |
| 10 | 82869699  | 82875955  | 6257    | 3   | loss | 2  | 2.9%  | Known variation | NRG3 promoter                                                                                                                       |
| 11 | 38188336  | 38965147  | 776812  | 58  | loss | 1  | 1.5%  | Known variation |                                                                                                                                     |
| 11 | 84219051  | 84245672  | 26622   | 4   | loss | 1  | 1.5%  | Known variation | DLG2, intron                                                                                                                        |
| 11 | 89843914  | 91455249  | 1611336 | 121 | loss | 1  | 1.5%  | Known variation |                                                                                                                                     |
| 11 | 133873030 | 134225383 | 352354  | 69  | gain | 1  | 1.5%  | Known variation |                                                                                                                                     |
| 12 | 7884583   | 8017012   | 132430  | 14  | gain | 5  | 7.4%  | Known variation | SLC2A14, SLC2A3                                                                                                                     |
| 12 | 31157554  | 31293957  | 136404  | 12  | gain | 1  | 1.5%  | Known variation | OVOS2                                                                                                                               |
| 12 | 31898373  | 31954269  | 55897   | 12  | gain | 2  | 2.9%  | Known variation |                                                                                                                                     |
| 12 | 42212399  | 42288535  | 76137   | 12  | loss | 2  | 2.9%  | Known variation | ADAMTS20                                                                                                                            |
| 12 | 81671084  | 81707620  | 36537   | 5   | loss | 1  | 1.5%  | Known variation | TMTC2, intron                                                                                                                       |
| 12 | 98788860  | 98966181  | 177322  | 18  | gain | 1  | 1.5%  | Known variation | ANKS1B exon1, KIAA0701 last 7 exons                                                                                                 |
| 12 | 130255197 | 130339814 | 84618   | 11  | loss | 1  | 1.5%  | Known variation |                                                                                                                                     |
| 13 | 67542909  | 67552774  | 9866    | 3   | gain | 1  | 1.5%  | NEW             |                                                                                                                                     |
| 13 | 83009774  | 83055928  | 46155   | 8   | loss | 8  | 11.8% | Known variation | After SLITRK1                                                                                                                       |
| 13 | 94733590  | 94779857  | 46268   | 11  | gain | 1  | 1.5%  | Known variation | ABCC4 promoter & exon1                                                                                                              |
| 13 | 94797740  | 94825508  | 27769   | 7   | gain | 1  | 1.5%  | Known variation |                                                                                                                                     |
| 14 | 73494691  | 73538366  | 43676   | 4   | loss | 1  | 1.5%  | NEW             | COQ6 last 8 exons, ENTPD5 exons 1-13                                                                                                |
| 15 | 20347960  | 20777695  | 429736  | 50  | gain | 1  | 1.5%  | Known variation | TUBGCP5, CYFIP1, NIPA2, NIPA1                                                                                                       |
| 15 | 38624662  | 39476524  | 851863  | 53  | loss | 2  | 2.9%  | Known variation | CCDC32, RPUSD2, CASC5, RAD51, FAM82C, GCHFR, DNAJC17, ZFYVE19, PPP1R14D, SPINT1, RHOV, VPS18, DLL4, CHAC1, INOC1, EXDL1, CHP, OIP5, |

## NUSAP1, NDUFAF1

|    |           |           |         |    |      |   |      |                 |                                                                   |
|----|-----------|-----------|---------|----|------|---|------|-----------------|-------------------------------------------------------------------|
| 15 | 98736980  | 98770528  | 33549   | 5  | loss | 1 | 1.5% | Known variation | LASS3                                                             |
| 16 | 21515973  | 21647775  | 131803  | 12 | loss | 1 | 1.5% | Known variation | METTL9, IGSF6, OTOA                                               |
| 16 | 81289305  | 81385638  | 96334   | 27 | loss | 1 | 1.5% | Known variation | CDH13, intron                                                     |
| 17 | 30708148  | 30792312  | 84165   | 14 | loss | 1 | 1.5% | Known variation | SLFN11 promoter & exons 1-4, SLFN12, SLFN13 exon1                 |
| 17 | 38782929  | 38958044  | 175116  | 13 | gain | 1 | 1.5% | Known variation | ARL4D, DHX8, near BRCA1                                           |
| 17 | 74878104  | 74905197  | 27094   | 9  | gain | 1 | 1.5% | Known variation | HRNBP3                                                            |
| 18 | 1917798   | 1970668   | 52871   | 9  | loss | 1 | 1.5% | Known variation |                                                                   |
| 18 | 56949141  | 56950768  | 1628    | 3  | loss | 1 | 1.5% | NEW             |                                                                   |
| 18 | 62947038  | 63159299  | 212262  | 31 | gain | 1 | 1.5% | Known variation | After DSEL                                                        |
| 18 | 64897188  | 64909977  | 12790   | 3  | loss | 5 | 7.4% | Known variation | After hypothetical proteins CCDC102B & TXNDC10. DOK6 promoter     |
| 19 | 3755701   | 3786177   | 30477   | 9  | gain | 1 | 1.5% | Known variation | KIAA1086, ATCAY promoter, MATK promoter                           |
| 19 | 7658063   | 7691713   | 33651   | 6  | gain | 1 | 1.5% | Known variation | FCER2 whole gene & promoter                                       |
| 19 | 48066441  | 48350666  | 284226  | 6  | loss | 2 | 2.9% | Known variation | PSG1, PSG6, PSG7, PSG11, PSG2, PSG5, PSG4, PSG9                   |
| 19 | 59994795  | 60069820  | 75026   | 5  | loss | 1 | 1.5% | Known variation | KIR3DP1, KIR2DL4, KIR3DL1, KIR2DS4, KIR3DL2, FCAR & NCR1 promoter |
| 20 | 5219710   | 5345328   | 125619  | 22 | loss | 1 | 1.5% | Known variation | PROKR2 whole gene and promoter                                    |
| 20 | 14874333  | 15089959  | 215627  | 38 | loss | 1 | 1.5% | Known variation | MACROD2                                                           |
| 21 | 18981497  | 19000295  | 18799   | 6  | gain | 1 | 1.5% | Known variation | PRSS7 promoter                                                    |
| 21 | 43646295  | 43663581  | 17287   | 7  | gain | 1 | 1.5% | Known variation | SNF1LK                                                            |
| 22 | 20654301  | 20920813  | 266513  | 48 | gain | 1 | 1.5% | Known variation | TOP3B, IGLC1                                                      |
| 22 | 23974960  | 24235221  | 260262  | 10 | gain | 2 | 2.9% | Known variation | LRP5L                                                             |
| 22 | 32490635  | 32503091  | 12457   | 6  | gain | 1 | 1.5% | Known variation | LARGE, intron                                                     |
| X  | 6317902   | 7961924   | 1644023 | 92 | gain | 1 | 1.5% | Known variation | HDHD1A, STS, VCX, PNPLA4, VCX2                                    |
| X  | 91173351  | 91262603  | 89253   | 5  | loss | 1 | 1.5% | Known variation | PCDH11X intron & exon3                                            |
| X  | 140076396 | 140280802 | 204407  | 30 | loss | 2 | 2.9% | Known variation | SPANXA2 intron                                                    |

**Table S4. SNPs with  $P < 10^{-4}$  in the Genome-wide Association Analysis Were Replicated in Independent Finnish Sample Sets**

| Chr | bp        | SNP        |   | Isolate GWA<br>n(MS)=68, n(ctrl)=136 |             |          |      | Isolate (Independent)<br>n(MS)=83, n(ctrl)=365 |             |       |         | Finland<br>n(MS)=628, n(ctrl)=668 |             |       |         | Combined CMH<br>n(MS)=711,<br>n(ctrl)=1033 |         |      |
|-----|-----------|------------|---|--------------------------------------|-------------|----------|------|------------------------------------------------|-------------|-------|---------|-----------------------------------|-------------|-------|---------|--------------------------------------------|---------|------|
|     |           |            |   | MAF<br>MS                            | MAF<br>ctrl | p        | OR   | MAF<br>MS                                      | MAF<br>ctrl | p     | OR      | MAF<br>MS                         | MAF<br>ctrl | p     | OR      | p                                          | OR      |      |
| 1   | 246044043 | rs10736372 | G | 0.162                                | 0.040       | 2.27E-05 | 4.58 | G                                              | 0.085       | 0.088 | 0.9039  | 0.96                              | 0.064       | 0.066 | 0.8707  | 0.97                                       | 0.8421  | 0.97 |
| 3   | 180874014 | rs4854945  | C | 0.250                                | 0.460       | 5.16E-05 | 0.39 | C                                              | 0.325       | 0.366 | 0.3265  | 0.84                              | 0.332       | 0.316 | 0.3802  | 1.08                                       | 0.6759  | 1.03 |
| 4   | 138364575 | rs7696692  | A | 0.500                                | 0.302       | 8.83E-05 | 2.32 | A                                              | 0.361       | 0.375 | 0.7382  | 0.94                              | 0.342       | 0.341 | 0.9236  | 1.01                                       | 0.9553  | 1.00 |
| 4   | 182400130 | rs13121504 | G | 0.145                                | 0.033       | 4.07E-05 | 4.96 | G                                              | 0.048       | 0.045 | 0.8792  | 1.07                              | 0.048       | 0.062 | 0.1003  | 0.75                                       | 0.1402  | 0.79 |
| 4   | 186744181 | rs1046236  | A | 0.441                                | 0.246       | 6.15E-05 | 2.42 | A                                              | 0.307       | 0.326 | 0.6400  | 0.92                              | 0.260       | 0.265 | 0.7369  | 0.97                                       | 0.6239  | 0.96 |
| 6   | 32509195  | rs3135338  | A | 0.544                                | 0.298       | 1.35E-06 | 2.81 | A                                              | 0.333       | 0.138 | 5.4E-10 | 3.12                              | 0.291       | 0.128 | 1.8E-25 | 2.80                                       | 1.6E-25 | 3.43 |
| 6   | 42169711  | rs7749023  | C | 0.507                                | 0.309       | 9.43E-05 | 2.31 | C                                              | 0.368       | 0.378 | 0.7989  | 0.96                              | 0.385       | 0.379 | 0.7223  | 1.03                                       | 0.8357  | 1.02 |
| 7   | 129421525 | rs12533403 | A | 0.331                                | 0.537       | 8.54E-05 | 0.43 | A                                              | 0.488       | 0.473 | 0.7340  | 1.06                              | 0.486       | 0.447 | 0.0482  | 1.17                                       | 0.0474  | 1.15 |
| 8   | 16712180  | rs2134111  | A | 0.368                                | 0.574       | 8.82E-05 | 2.31 | A                                              | 0.415       | 0.448 | 0.4397  | 0.87                              | 0.429       | 0.420 | 0.6268  | 1.04                                       | 0.9193  | 1.01 |
| 8   | 15188615  | rs12675001 | A | 0.243                                | 0.445       | 7.13E-05 | 0.40 | A                                              | 0.384       | 0.355 | 0.5116  | 1.13                              | 0.326       | 0.340 | 0.4170  | 0.94                                       | 0.630   | 0.96 |
| 11  | 69515796  | rs1994776  | G | 0.470                                | 0.261       | 2.51E-05 | 2.51 | G                                              | 0.277       | 0.318 | 0.3062  | 0.82                              | 0.362       | 0.331 | 0.1013  | 1.15                                       | 0.2804  | 1.09 |
| 11  | 70119917  | rs720629   | G | 0.053                                | 0.228       | 1.18E-05 | 0.19 | G                                              | 0.171       | 0.178 | 0.8215  | 0.95                              | 0.154       | 0.165 | 0.4662  | 0.92                                       | 0.4511  | 0.93 |
| 11  | 74672874  | rs480174   | A | 0.382                                | 0.165       | 1.22E-06 | 3.12 | A                                              | n.a.        | n.a.  | n.a.    | n.a.                              | 0.287       | 0.275 | 0.5047  | 1.06                                       | 0.4765  | 1.06 |
| 11  | 74694735  | rs611908   | A | 0.419                                | 0.202       | 3.69E-06 | 2.85 | A                                              | 0.319       | 0.280 | 0.3058  | 1.21                              | 0.327       | 0.306 | 0.2359  | 1.11                                       | 0.1426  | 1.12 |
| 11  | 74801780  | rs571632   | A | 0.331                                | 0.540       | 6.4E-05  | 0.42 | A                                              | 0.434       | 0.496 | 0.1847  | 0.78                              | n.a.        | n.a.  | n.a.    | N.a.                                       | 0.08217 | 0.87 |
| 12  | 10785930  | rs17809949 | G | 0.471                                | 0.276       | 9.05E-05 | 2.34 | G                                              | 0.354       | 0.315 | 0.3441  | 1.19                              | 0.315       | 0.326 | 0.5729  | 0.95                                       | 0.8772  | 0.99 |
| 12  | 51096513  | rs1610791  | A | 0.493                                | 0.235       | 1.53E-07 | 3.16 | A                                              | 0.343       | 0.313 | 0.4514  | 1.15                              | 0.283       | 0.269 | 0.4018  | 1.08                                       | 0.291   | 1.09 |
| 12  | 68684239  | rs1152944  | G | 0.184                                | 0.051       | 1.82E-05 | 4.15 | G                                              | 0.115       | 0.103 | 0.6729  | 1.12                              | 0.113       | 0.117 | 0.7470  | 0.96                                       | 0.9572  | 0.99 |
| 12  | 111574024 | rs232921   | A | 0.617                                | 0.390       | 2.08E-05 | 2.53 | A                                              | 0.494       | 0.423 | 0.0974  | 1.33                              | 0.363       | 0.356 | 0.6987  | 1.03                                       | 0.3091  | 1.08 |
| 13  | 61230371  | rs6562206  | A | 0.397                                | 0.199       | 1.83E-05 | 2.66 | A                                              | 0.271       | 0.282 | 0.7736  | 0.95                              | n.a.        | n.a.  | n.a.    | n.a.                                       | 0.01884 | 1.21 |
| 15  | 27170361  | rs11070500 | A | 0.118                                | 0.022       | 5.58E-05 | 5.91 | A                                              | 0.072       | 0.045 | 0.1541  | 1.64                              | 0.058       | 0.073 | 0.1369  | 0.79                                       | 0.4215  | 0.89 |
| 16  | 58696642  | rs1364194  | A | 0.169                                | 0.044       | 2.14E-05 | 4.41 | A                                              | 0.121       | 0.062 | 0.0086  | 2.08                              | 0.076       | 0.058 | 0.0553  | 1.35                                       | 0.00465 | 1.48 |
| 16  | 77850583  | rs270443   | G | 0.544                                | 0.335       | 4.79E-05 | 2.37 | G                                              | 0.488       | 0.398 | 0.0342  | 1.44                              | 0.362       | 0.362 | 0.9919  | 1.00                                       | 0.3675  | 1.07 |
| 17  | 37767727  | rs744166   | G | 0.559                                | 0.353       | 7.19E-05 | 2.32 | G                                              | 0.470       | 0.406 | 0.1288  | 1.30                              | 0.446       | 0.391 | 0.0044  | 1.26                                       | 0.00120 | 1.27 |
| 17  | 13978033  | rs8079640  | A | 0.081                                | 0.007       | 6.71E-05 | 11.9 | A                                              | 0.048       | 0.032 | 0.3251  | 1.54                              | 0.028       | 0.021 | 0.2840  | 1.31                                       | 0.1613  | 1.36 |

|    |          |           |   |       |       |          |      |   |       |       |        |      |       |       |        |      |        |      |
|----|----------|-----------|---|-------|-------|----------|------|---|-------|-------|--------|------|-------|-------|--------|------|--------|------|
| 17 | 37932924 | rs647397  | A | 0.294 | 0.129 | 4.76E-05 | 2.82 | A | 0.183 | 0.176 | 0.8296 | 1.05 | 0.205 | 0.178 | 0.0776 | 1.19 | 0.0816 | 1.17 |
| 20 | 34443365 | rs6130176 | A | 0.096 | 0.265 | 7.33E-05 | 0.29 | A | 0.217 | 0.204 | 0.7140 | 1.08 | 0.196 | 0.220 | 0.1295 | 0.86 | 0.2313 | 0.90 |
| 21 | 27006619 | rs2952414 | A | 0.324 | 0.143 | 2.03E-05 | 2.86 | A | 0.206 | 0.195 | 0.7406 | 1.07 | 0.256 | 0.239 | 0.3264 | 1.10 | 0.302  | 1.09 |

We identified 27 loci with  $P < 10^{-4}$  in the genome-wide association analysis of 68 MS cases from the Southern Ostrobothnia and 136 IBS matched controls and at least one SNP per loci was genotyped in the replication phase. This table shows the original GWAS association result and the replication results of these SNPs in an independent isolate sample (83 MS cases, 365 controls) and a more heterogenous general Finnish sample set (628 MS cases and 664 controls). The replication results were combined using Cochran-Mantel-Haenszel population stratified analysis.

**Table S5. Summary of Results for rs744166 (chr17) in STAT3 and rs1364194 (chr16) by Population**

| Study<br>Population                         | Chr17, rs744166 (A) |                  |                               |             |                    | Chr16, rs1364194 (A) |                  |               |             |                    |
|---------------------------------------------|---------------------|------------------|-------------------------------|-------------|--------------------|----------------------|------------------|---------------|-------------|--------------------|
|                                             | Freq<br>MS          | Freq<br>Controls | P                             | OR          | 95% CI             | Freq<br>MS           | Freq<br>Controls | P             | OR          | 95% CI             |
| Finland SO<br>isolate GWA                   | 0.441               | 0.647            | 0.0000719                     | 0.43        | (0.28-0.66)        | 0.169                | 0.044            | 0.0000214     | 4.41        | (2.12-9.17)        |
| Finland SO<br>replication                   | 0.530               | 0.594            | 0.129                         | 0.77        | (0.55-1.08)        | 0.121                | 0.062            | 0.00861       | 2.08        | (1.19-3.63)        |
| Finland                                     | 0.554               | 0.609            | 0.000444                      | 0.80        | (0.68-0.93)        | 0.077                | 0.058            | 0.0553        | 1.35        | (0.99-1.84)        |
| Norway                                      | 0.551               | 0.589            | 0.0439                        | 0.86        | (0.74-0.99)        | 0.077                | 0.080            | 0.720         | 0.72        | (0.72-1.25)        |
| Denmark                                     | 0.511               | 0.572            | 0.000556                      | 0.78        | (0.68-0.90)        | 0.078                | 0.087            | 0.383         | 0.89        | (0.69-1.15)        |
| GeneMSA                                     |                     |                  | 0.757                         | 0.96        | (0.74-1.25)        | 0.097                | 0.088            | 0.682         | 1.10        | (0.70-1.72)        |
| Switzerland                                 | 0.591               | 0.601            |                               |             |                    |                      |                  |               |             |                    |
| GeneMSA                                     |                     |                  | 0.0214                        | 0.74        | (0.57-0.96)        | 0.104                | 0.084            | 0.291         | 1.27        | (0.81-1.98)        |
| Netherland                                  | 0.513               | 0.588            |                               |             |                    |                      |                  |               |             |                    |
| GeneMSA US                                  | 0.537               | 0.608            | 0.00222                       | 0.75        | (0.62-0.90)        | 0.080                | 0.072            | 0.503         | 1.13        | (0.80-1.59)        |
| IMSGC UK <sup>a</sup>                       | 0.541               | 0.56             | 0.267                         | 0.93        | (0.80-1.07)        | 0.043                | 0.039            | 0.576         | 1.10        | (0.78-1.56)        |
| IMSGC US <sup>a</sup>                       | 0.575               | 0.582            | 0.7124                        | 0.97        | (0.82-1.15)        | 0.028                | 0.040            | 0.138         | 0.69        | (0.43-1.13)        |
| BWH <sup>a</sup>                            | 0.557               | 0.597            | 0.00623                       | 0.85        | (0.76-0.95)        | 0.036                | 0.033            | 0.513         | 1.11        | (0.81-1.52)        |
| <b>Combined<br/>replication<sup>b</sup></b> | <b>0.546</b>        | <b>0.581</b>     | <b>2.753x10<sup>-10</sup></b> | <b>0.87</b> | <b>(0.83-0.91)</b> | <b>0.081</b>         | <b>0.058</b>     | <b>0.0793</b> | <b>1.10</b> | <b>(0.99-1.23)</b> |

The SNP rs744166 in STAT3 was associated with MS susceptibility in multiple independent populations, but we gained no additional support for rs1364194 in non-Finnish populations.

<sup>a</sup>Genotypes imputed for rs1364194

<sup>b</sup>Combined analysis of the replication sets (original analysis set Finland SO isolate GWA not included) was done using the Cochran-Mantel-Haenszel analysis implemented in PLINK<sup>33</sup>. Each population was treated as a separate cluster. The US samples were analyzed as three separate clusters, since they were all genotyped with different platforms (Table 1) and the Gene MSA sets in different centers. The combined MAFs are weighed averages of the population specific minor allele frequencies.



**Table S6. Association for rs744166 G Allele in chr 17: 37767727 Results Using Different Models**

| <b>Model</b> | <b>OR</b> | <b>SE</b> | <b>L95</b> | <b>U95</b> | <b>STAT</b> | <b>P</b> |
|--------------|-----------|-----------|------------|------------|-------------|----------|
| Additive     | 1.157     | 0.02561   | 1.1        | 1.216      | 5.683       | 1.33E-08 |
| Dominant     | 1.184     | 0.03836   | 1.098      | 1.276      | 4.398       | 1.09E-05 |
| Recessive    | 1.243     | 0.04475   | 1.138      | 1.357      | 4.858       | 1.19E-06 |

This table shows the results of a logistic regression analysis in PLINK using population as a covariate. OR stands for odds ratio, SE for standard errors, L95 and U95 are the 95 % confidence intervals, STAT is the coefficient t-statistic and P is the asymptotic p-value for t-statistic.

**Table S7. Haplotype Diversity in the STAT3 Locus in Hapmap 23a Populations**

| Frequencies |             |             |             | SNPs      |            |            |           |           |            |           |           |           |           |           |                  |           |           |           |           |           |            |                             |           |                 |           |             |           |           |           |
|-------------|-------------|-------------|-------------|-----------|------------|------------|-----------|-----------|------------|-----------|-----------|-----------|-----------|-----------|------------------|-----------|-----------|-----------|-----------|-----------|------------|-----------------------------|-----------|-----------------|-----------|-------------|-----------|-----------|-----------|
| JPT         | CHB         | CEU         | YRI         | rs8075442 | rs12721576 | rs12721583 | rs2306580 | rs7215104 | rs10153241 | rs9890802 | rs9889396 | rs8069645 | rs7217655 | rs3816769 | <b>rs6503695</b> | rs6503696 | rs6503697 | rs4103200 | rs9891119 | rs9912773 | rs17593222 | <b>rs744166<sup>a</sup></b> | rs3785898 | <b>rs957970</b> | rs1905340 | rs129449918 | rs4796644 | rs1026916 | rs7211777 |
| 0           | 0           | 0           | 0.08        | T         | C          | A          | C         | C         | T          | C         | G         | A         | C         | T         | <b>T</b>         | C         | A         | G         | A         | C         | C          | <b>T</b>                    | G         | <b>T</b>        | C         | T           | G         | G         | G         |
| 0           | 0           | 0           | 0.06        | T         | C          | T          | C         | C         | T          | C         | G         | A         | C         | T         | <b>T</b>         | C         | A         | G         | A         | C         | C          | <b>T</b>                    | G         | <b>T</b>        | C         | T           | G         | G         | G         |
| <b>0.57</b> | <b>0.66</b> | <b>0.56</b> | <b>0.07</b> | <b>C</b>  | <b>C</b>   | <b>T</b>   | <b>C</b>  | <b>C</b>  | <b>T</b>   | <b>C</b>  | <b>G</b>  | <b>A</b>  | <b>C</b>  | <b>T</b>  | <b>T</b>         | <b>C</b>  | <b>A</b>  | <b>G</b>  | <b>A</b>  | <b>C</b>  | <b>C</b>   | <b>T</b>                    | <b>G</b>  | <b>T</b>        | <b>C</b>  | <b>T</b>    | <b>G</b>  | <b>G</b>  | <b>A</b>  |
| 0           | 0           | 0           | 0.01        | T         | C          | T          | C         | C         | T          | C         | G         | A         | C         | T         | <b>T</b>         | C         | A         | G         | A         | C         | C          | <b>T</b>                    | G         | <b>T</b>        | C         | T           | G         | G         | A         |
| <i>0.40</i> | <i>0.33</i> | <i>0.23</i> | <i>0.31</i> | <i>C</i>  | <i>C</i>   | <i>T</i>   | <i>C</i>  | <i>C</i>  | <i>T</i>   | <i>C</i>  | <i>G</i>  | <i>G</i>  | <i>T</i>  | <i>C</i>  | <i>C</i>         | <i>T</i>  | <i>T</i>  | <i>C</i>  | <i>C</i>  | <i>G</i>  | <i>C</i>   | <i>C</i>                    | <i>T</i>  | <i>C</i>        | <i>A</i>  | <i>C</i>    | <i>G</i>  | <i>A</i>  | <i>G</i>  |
| 0           | 0           | 0.02        | 0.24        | C         | C          | T          | C         | C         | T          | C         | G         | G         | T         | C         | <b>C</b>         | T         | T         | C         | C         | C         | C          | <b>C</b>                    | T         | <b>C</b>        | A         | C           | G         | A         | G         |
| 0           | 0           | 0           | 0.06        | T         | C          | T          | C         | C         | T          | C         | G         | G         | T         | C         | <b>C</b>         | T         | T         | C         | C         | C         | C          | <b>C</b>                    | T         | <b>C</b>        | A         | C           | G         | A         | G         |
| 0           | 0           |             | 0.06        | T         | G          | T          | G         | T         | C          | A         | A         | A         | C         | T         | <b>T</b>         | C         | A         | G         | A         | C         | C          | <b>C</b>                    | G         | <b>T</b>        | C         | T           | C         | A         | G         |
| 0           | 0           |             | 0.03        | C         | C          | T          | C         | C         | T          | C         | G         | A         | C         | T         | <b>T</b>         | C         | A         | G         | C         | C         | C          | <b>C</b>                    | T         | <b>C</b>        | A         | T           | G         | A         | G         |
| 0           | 0           |             | 0.03        | T         | G          | T          | G         | T         | C          | A         | A         | A         | C         | T         | <b>T</b>         | C         | A         | G         | A         | C         | C          | <b>C</b>                    | G         | <b>T</b>        | C         | T           | G         | G         | G         |
| 0           | 0           |             | 0.02        | T         | G          | T          | G         | T         | C          | A         | A         | A         | C         | T         | <b>T</b>         | C         | A         | G         | A         | C         | C          | <b>C</b>                    | G         | <b>T</b>        | C         | T           | G         | A         | G         |
| 0           | 0           | 0.08        | 0           | na        | na         | na         | na        | na        | na         | na        | na        | A         | C         | T         | <b>C</b>         | C         | A         | G         | A         | C         | C          | <b>C</b>                    | G         | <b>T</b>        | n         | C           | na        | G         | A         |
| 0.03        | 0.01        | 0           | 0.01        | C         | C          | T          | G         | C         | T          | C         | G         | A         | T         | C         | <b>T</b>         | C         | A         | G         | C         | C         | C          | <b>C</b>                    | G         | <b>C</b>        | C         | C           | G         | A         | G         |
| 0           | 0           | 0.11        | 0           | C         | C          | T          | G         | C         | T          | C         | G         | A         | T         | C         | <b>T</b>         | C         | A         | G         | C         | C         | G          | <b>C</b>                    | G         | <b>C</b>        | C         | C           | G         | A         | G         |

The three SNPs (rs6503695m, rs744166 and rs957970) selected to tag the STAT3 LD-block haplotypes can differentiate 4 of the 5 haplotypes observed in the CEU population in Hapman 23a build. The increase in the MS protective haplotype marked with bold and italics is at least eight times more common in the non-African populations. The SNPs used in following haplotype analyses are bolded. The putative predisposing haplotype is in italics.

<sup>a</sup>The SNP rs744166 is in C/T orientation in the HapMap genotype database.

**Table S8. The Haplotype Frequencies and Association Results by Study Set**

| Haplotype        | SO (93 MS, 342 ctrl) |       |        | Fin (534MS, 575 ctrl) |       |        | Meta <sup>a</sup> (2624 MS, 7220 ctrl) |       |          |
|------------------|----------------------|-------|--------|-----------------------|-------|--------|----------------------------------------|-------|----------|
|                  | MS                   | CTRL  | P      | MS                    | CTRL  | P      | MS                                     | CTRL  | P        |
| TAA <sup>b</sup> | 0.516                | 0.592 | 0.256  | 0.569                 | 0.622 | 0.0119 | 0.552                                  | 0.578 | 6.02E-05 |
| CGG <sup>c</sup> | 0.285                | 0.244 | 0.0630 | 0.289                 | 0.250 | 0.0348 | 0.308                                  | 0.278 | 2.61E-05 |
| TGG              | 0.134                | 0.126 | 0.0989 | 0.099                 | 0.093 | 0.620  | 0.079                                  | 0.077 | 0.527    |
| CGA              | 0.065                | 0.038 | 0.117  | 0.041                 | 0.036 | 0.497  | 0.066                                  | 0.078 | 0.556    |

Results of the three SNP haplotype analysis (rs6503695, rs744166 and rs957970).

<sup>a</sup>The Meta subgroup includes the IMSGC US and UK sets<sup>7</sup>, the Gene MSA Switzerland, The Netherlands and US sets<sup>46</sup>, and the BWH<sup>16</sup> sets combined using CMH.

<sup>b</sup>The putative protective haplotype (TAA) is less common in cases compared to controls.

<sup>c</sup>The putative predisposing haplotype (CGG) is enriched in MS cases in all populations.
